# Supplementary material
Source: publisher site journal article supplement (https://www.dovepress.com/article/339092)
Supplement: Supplementary file 1 [file get_supplementary_file.php]

**Supplementary materials**

**Methods**

***In vivo* oral toxicity study of garlic**

The acute oral toxicity of garlic extract (GE) was investigated in the mice by the method (Lorke et al. 1983) and classified, as per the guidelines by the Organization for Economic Co-operation and Development (OECD). Twenty-four animals were given varying doses of garlic extract in two phases (12 in each phase). In the first phase, twelve mice for GE were divided into 4 groups of 3 mice each for the doses of 0, 10, 100 and 1000 mg/kg body weight (b.w). Groups 2, 3 and 4 animals were given 10, 100 and 1000 mg/kg body weight (bw). In the second phase, additional precise doses of 1000, 1600, 2900 & 5000 mg/kg bw were administered to three mice per dose group to further determine the correct LD50 value. All the animals included in the study were observed regularly from the day of the exposure for two weeks.

The **LD50** was calculated by the formula:

LD50 =

**D0** = Highest dose that gave no mortality

**D100**= Lowest dose that produced mortality

**Results**

The acute oral toxicity assay revealed that the LD50 of GE was measured to be 3807.88 mg/kg b.w (Table 1,2). According to chemical labelling and classification of acute systemic toxicity suggested by OECD, the garlic extract was given class 5 status (LD50>2000-5000 mg/kg).

**Table S1:** General Appearance and Behavioral Observations of Oral Acute Toxicity Phase 1 Study

| **Observations** | **GE 0** | **GE 10** | **GE 100** | **GE 1000** |
| --- | --- | --- | --- | --- |
| Skin and fur | NAD | NAD | NAD | NAD |
| Eyes | NAD | NAD | NAD | NAD |
| Mucous membrane | NAD | NAD | NAD | NAD |
| Behavioral patterns | NAD | NAD | NAD | NAD |
| Salivation | NAD | NAD | NAD | NAD |
| Lethargy/Sleep | NAD | NAD | NAD | NAD |
| Diarrhea | NAD | NAD | NAD | NAD |
| Mortality | 0/3 | 0/3 | 0/3 | 0/3 |

**Table S2:** General Appearance and Behavioral Observations of Oral Acute Toxicity Phase 2 Study

| **Observations** | **GE 1000** | **GE 1600** | **GE 2900** | **GE 5000** |
| --- | --- | --- | --- | --- |
| Skin and fur | NAD | NAD | NAD | Piloerection |
| Eyes | NAD | NAD | NAD | Blinking of the eyes |
| Mucous membrane | NAD | NAD | NAD | NAD |
| Behavioral patterns | NAD | NAD | NAD | DMA & Rapid heart beat |
| Salivation | NAD | NAD | NAD | NAD |
| Lethargy/Sleep | NAD | NAD | NAD | DMA |
| Diarrhea | NAD | NAD | NAD | NAD |
| Mortality | 0/3 | 0/3 | 0/3 | 2/3 |

**References:**

1. Lorke, D. (1983). A new approach to practical acute toxicity testing. Archives of toxicology, 54(4), 275-287. DOI https://doi.org/10.1007/BF01234480
